# Supplementary material for: NH 3 emissions from large point sources derived from CrIS and IASI satellite observations
Source: Copernicus journal article supplement (doi:10.5194/acp-19-12261-2019), 2019-10-02
Supplement: Supplementary file 1 [file acp-19-12261-2019-supplement.zip]

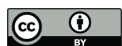

*Supplement of*

## **NH<sub>3</sub> emissions from large point sources derived from CrIS and IASI satellite observations**

**Enrico Dammers et al.**

*Correspondence to:* Enrico Dammers ([enrico.dammers@gmail.com](mailto:enrico.dammers@gmail.com), [enrico.dammers@canada.ca](mailto:enrico.dammers@canada.ca))

- [acp-19-12261-2019-supplement-title-page.pdf](#)
- [final\\_source\\_list\\_fixed\\_sig\\_life\\_v2.2\\_draft2\\_CrIS.csv](#)
- [final\\_source\\_list\\_fixed\\_sig\\_life\\_v2.2\\_draft2\\_IASI\\_A.csv](#)
- [final\\_source\\_list\\_fixed\\_sig\\_life\\_v2.2\\_draft2\\_IASI\\_A\\_10year.csv](#)
- [final\\_source\\_list\\_fixed\\_sig\\_life\\_v2.2\\_draft2\\_IASI\\_B.csv](#)

The copyright of individual parts of the supplement might differ from the CC BY 4.0 License.
